# Learning the synaptic and intrinsic membrane dynamics underlying working memory in spiking neural network models

Yinghao Li <sup>1</sup>, Robert Kim <sup>1,2,3</sup>, Terrence J. Sejnowski <sup>1,4,5</sup> \*

<sup>1</sup> Computational Neurobiology Laboratory, Salk Institute for Biological Studies, La Jolla, CA 92037, USA

<sup>2</sup> Neurosciences Graduate Program, University of California San Diego, La Jolla, CA 92093, USA

<sup>3</sup> Medical Scientist Training Program, University of California San Diego, La Jolla, CA 92093, USA

<sup>4</sup> Institute for Neural Computation, University of California San Diego, La Jolla, CA 92093, USA

<sup>5</sup> Division of Biological Sciences, University of California San Diego, La Jolla, CA 92093, USA

\* Correspondence: [terry@salk.edu](mailto:terry@salk.edu) (T.J.S.)

## Summary

Recurrent neural network (RNN) model trained to perform cognitive tasks is a useful computational tool for understanding how cortical circuits execute complex computations. However, these models are often composed of units that interact with one another using continuous signals and overlook parameters intrinsic to spiking neurons. Here, we developed a method to directly train not only synaptic-related variables but also membrane-related parameters of a spiking RNN model. Training our model on a wide range of cognitive tasks resulted in diverse yet task-specific synaptic and membrane parameters. We also show that fast membrane time constants and slow synaptic decay dynamics naturally emerge from our model when it is trained on tasks associated with working memory (WM). Further dissecting the optimized parameters revealed that fast membrane properties and slow synaptic dynamics are important for encoding stimuli and WM maintenance, respectively. This approach offers a unique window into how connectivity patterns and intrinsic neuronal properties contribute to complex dynamics in neural populations.

# 1 Introduction

2 Neurons in the cortex form recurrent connections that give rise to the complex dynamic processes  
3 underlying computational functions [1–4]. Previous studies have used models based on recurrent  
4 neural networks (RNNs) of continuous-rate units to characterize network dynamics behind neural  
5 computations and to validate experimental findings [5–10]. However, these models do not explain  
6 how intrinsic membrane properties could also contribute to the emerging dynamics.

7 Rate-based encoding of information has been reliably observed in experimental settings [8].  
8 However, recent studies demonstrated that membrane potential dynamics along with spike-based  
9 coding are also capable of reliably transmitting information [11–13]. In addition, the intrinsic  
10 membrane properties of inhibitory neurons, including the membrane time constant and rheobase  
11 (minimum current required to evoke a single action potential), were different in two higher-order  
12 cortical areas [14]. These findings strongly indicate that neuronal intrinsic properties, often ignored  
13 in previous computational studies employing rate-based RNNs, are crucial for better understanding  
14 how distinct subtypes of neurons contribute to information processing.

15 Rate-based RNNs can be easily trained by stochastic gradient-descent to perform specified cog-  
16 nitive tasks [15]. However, similar supervised learning methods cannot be used to train spiking  
17 RNNs due to the non-differentiable behavior of action potentials [16]. Thus, several methods intro-  
18 duced differentiable approximations of the non-differentiable spiking dynamics [17–20]. These stud-  
19 ies directly applied backpropagation to tune synaptic connections for task-specific computations.  
20 Other methods that do not rely on gradient computations have been also utilized to train spiking  
21 networks. One such method is based on the first-order reduced and controlled error (FORCE)  
22 algorithm previously developed for rate RNNs [6]. The FORCE-based methods are capable of  
23 training spiking networks, but training all the parameters including recurrent connections could  
24 become computationally inefficient [21–23]. Lastly, recent studies successfully converted rate-based  
25 networks trained with a gradient-descent method to spiking networks for both convolutional and  
26 recurrent neural networks [24, 25]. Since these models are built on rate-coding networks, the result-  
27 ing spiking models do not take advantage of the rich spiking dynamics. Moreover, these previous  
28 models assume that all the units in a trained network are equivalent, even though experimental  
29 evidence shows that neurons in biological neural networks are highly heterogeneous. Such diversity

has a vital role in efficient neural coding [26].

Here, we present a new approach that can directly train not only recurrent synapses but also membrane-related parameters of a spiking RNN model. Our method utilizes mollifier functions [27] to alter the spiking dynamics to be differentiable, and a gradient-descent method is applied to tune the model parameters. These parameters are composed of synaptic parameters including recurrent connections and several important spiking-related parameters such as membrane time constant and action potential threshold. Neurons with diverse and heterogeneous intrinsic parameters emerged from training our spiking model on a wide range of cognitive tasks. Furthermore, we observed that both synaptic and spiking parameters worked in a synergistic manner to perform complex tasks that required information integration and working memory.

## Results

Here, we provide an overview of the method that we developed to directly train spiking recurrent neural network (RNN) models (for more details see Methods). Throughout the study, we considered recurrent network models composed of leaky integrate-and-fire (LIF) units whose membrane voltage dynamics were governed by:

$$\tau_{m,i} \frac{dv_i}{dt} = -(v_i(t) - v_{\text{rest}_i}) + R_i I_i(t) \quad (1)$$

where  $\tau_{m,i}$  is the membrane time constant of unit  $i$ ,  $v_i(t)$  is the membrane voltage of unit  $i$  at time  $t$ ,  $v_{\text{rest}_i}$  is the resting potential of unit  $i$ , and  $R_i$  is the input resistance of unit  $i$ .  $I_i(t)$  represents the current input to unit  $i$  at time  $t$ , which is given by:

$$I_i(t) = \sum_{j=1}^N s_{ij}(t) + I_{\text{ext}_i}(t) \quad (2)$$

where  $N$  is the total number of units in the network,  $s_{ij}(t)$  is the synaptic input from unit  $j$  to unit  $i$  at time  $t$ , and  $I_{\text{ext}_i}(t)$  is the external current source into unit  $i$  at time  $t$ . We used a single exponential synaptic filter to model the synaptic input ( $s$ ):

$$\tau_{ij} \frac{ds_{ij}}{dt} = -s_{ij}(t) + \sum_{t_j^{(k)} < t} w_{ij} \delta(t - t_j^{(k)}) \quad (3)$$

where  $\tau_{ij}$  is the decay time constant of the synaptic current from unit  $j$  to unit  $i$ ,  $w_{ij}$  is the synaptic strength from unit  $j$  to unit  $i$ ,  $t_j^{(k)}$  denotes the time of the  $k$ -th action potential of unit  $j$ , and  $\delta(x)$  is the Dirac delta function. Once the membrane voltage of the unit  $i$  crosses its action potential threshold ( $\vartheta_i$ ), its membrane voltage is brought back down to its reset voltage ( $v_{\text{reset},i}$ ).

Each LIF unit is characterized by five distinct parameters: membrane time constant ( $\tau_{m,i}$ ), resting potential ( $v_{\text{rest},i}$ ), input resistance ( $R_i$ ), action potential threshold ( $\vartheta_i$ ), and reset potential ( $v_{\text{reset},i}$ ). In addition, there are two trainable synaptic parameters: synaptic strength ( $w_{ij}$ ) and synaptic decay time constant ( $\tau_{ij}$ ) from unit  $j$  to unit  $i$ .

In order to tune all the parameters described above to produce functional spiking RNNs capable of performing cognitive tasks, we employed the commonly used gradient-descent method known as backpropagation through time (BPTT; [28]) with a few important modifications. We utilized mollifier gradient approximations to avoid the non-differentiability problem associated with training spiking networks with backpropagation [27]. Furthermore, we optimized each of the model parameters (except for the synaptic connectivity weights) in a biologically plausible range (see Methods). We also employed the weight parametrization method proposed by Song et al. to impose Dale’s principle [29] (see Methods). All the spiking RNN models trained in the study used the parameter value ranges listed in Supplementary Table 1 unless otherwise noted.

**Units with diverse parameter values emerge after training.** We applied our method to train spiking networks to perform the context-dependent input integration task previously employed by Mante et al. [8]. Briefly, Mante et al. trained rhesus monkeys to flexibly integrate sensory inputs (color and motion of randomly moving dots presented on a screen). A contextual cue was given to instruct the monkeys which sensory modality (color or motion) they should attend to. The monkeys were required to employ flexible computations as the same modality could be either relevant or irrelevant depending on the contextual cue. Several previous modeling studies have successfully implemented a simplified version of the task and reproduced the neural dynamics present in the experimental data with both continuous-rate RNNs and spiking RNNs converted from rate RNNs [25, 29, 30]. With our method, we were able to directly train the first, to our knowledge, spiking RNNs with heterogeneous units whose parameters were within biologically plausible limits.

In order to train spiking RNNs to perform the input integration task, we employed a task

paradigm similar to the one used by previous computational studies [8, 25, 29, 30]. A recurrently connected network received two streams of noisy input signals along with a constant-valued signal that encoded the contextual cue (Fig. 1A). The input signals were sampled from a standard Gaussian distribution (i.e., with zero mean and unit variance) and then shifted by a positive or negative “offset” value to simulate the evidence presented in the input modalities. The network was trained to produce an output signal approaching either +1 or −1 depending on the cue and the evidence present in the input signal: if the cued input had a positive mean, the output signal approached +1, and vice versa (Fig. 1B top). The input signal, 150 ms in duration, was given after a fixation period (300 ms), and the network was trained to produce an output signal immediately after the offset of the input signal.

We trained 20 spiking RNNs to perform the context-based input integration task. All the trainable parameters were initialized with random numbers drawn from a standard Gaussian distribution and re-scaled to the biologically plausible ranges (see Methods and Supplementary Table 1). Each network was trained until the training termination criteria were satisfied (see Methods). On average,  $508.21 \pm 45.96$  training trials were needed for a network to meet the training termination conditions. After training, a wide distribution of the parameters emerged for both excitatory and inhibitory populations (Fig. 1C, top).

Consistent with the previous experimental recordings from cortical neurons, the inhibitory units in our trained RNNs fired at a higher rate compared to the excitatory units [31]. The higher average firing rates of the inhibitory units were largely due to the intrinsic properties that resulted from training. Compared to the excitatory population, the inhibitory units in the trained RNNs had significantly larger input resistance, smaller membrane time constants, and more depolarized resting potential (Fig. 1C;  $P < 0.0001$ , two-sided Wilcoxon rank-sum test). The action potential thresholds and the reset potentials were significantly more depolarized for the inhibitory group. Furthermore, the time constants of the inhibitory synaptic current variable were significantly larger than the excitatory synaptic decay time constants (Fig. 1C).

**Working memory requires distinct parameter distributions.** The context-dependent input integration task considered in the previous section did not require complex cognitive skills such as working memory (WM) computations. In order to explore what parameter values are essential for

109 WM tasks, we modified the paradigm to incorporate a WM component by adding a delay period  
110 after the delivery of the input signals. The RNN model was trained to integrate the noisy input  
111 signals, sustain the integrated information throughout the 300 ms delay period, and produce an  
112 output signal (Fig. 1B bottom). We again trained 20 models for the modified integration task with  
113 the same training termination criteria (see Methods). This task required more training trials (on  
114 average  $1618.10 \pm 345.54$ ), but all the models were successfully trained within 2000 training trials.

115 Overall, the distributions of the trained parameters were similar to those observed from the  
116 RNNs trained on the non-WM version of the task (Fig. 1D). The parameters that were significantly  
117 different between the two RNN models were the membrane time constant and the synaptic decay  
118 time constant. The inhibitory units from the WM model displayed much faster membrane dynamics  
119 and slower synaptic decay compared to the inhibitory population of the non-WM model ( $P <$   
120  $0.0001$ , two-sided Wilcoxon rank-sum test).

121 To ensure that the patterns of the trained parameters and the distinct distributions of the two  
122 parameters ( $\tau_m$  and  $\tau$ ) observed from the delayed integration model were indeed associated with  
123 WM computations, we trained RNNs on two additional WM-related tasks: delayed matched-to-  
124 sample (DMS) and delayed discrimination (DIS) tasks. For each task, we again trained 20 RNNs.  
125 Both task paradigms included two sequential stimuli separated by a brief delay period. For the  
126 DMS task, the two input stimuli were either  $+1$  or  $-1$ ; if the two sequential had the same sign  
127 (i.e.,  $+1/+1$  or  $-1/-1$ ), the network was trained to have an output signal approaching  $+1$ ,  
128 while if the two stimuli had different signs (i.e.,  $+1/-1$  or  $-1/+1$ ), the output signal approached  
129  $-1$  (Fig. 2A; see Methods). The two input stimuli for the DIS task were sinusoidal waves with  
130 different frequencies, modeled after the task used by Romo et al. [32] where monkeys were trained  
131 to discriminate two vibratory stimuli. If the first stimulus had a higher (lower) frequency, our RNN  
132 model was trained to produce a positive (negative) output signal (Fig. 2B; see Methods).

133 It took longer to train our model on these two tasks compared to the delayed integration task  
134 ( $7103.95 \pm 3738.65$  trials for the DMS task and  $6985.47 \pm 2112.34$  trials for the DIS task). The  
135 distributions of the tuned parameters from the two WM tasks were similar to the distributions  
136 obtained from the delayed integration task (Fig. 2C and D). More importantly, we again observed  
137 significantly faster membrane voltage dynamics and slower synaptic decay from the inhibitory

units in the DMS and DIS models compared to the inhibitory units from the non-WM task. These findings strongly suggest that the two parameters ( $\tau_m$  and  $\tau$ ) of the inhibitory group contribute to important dynamics associated with WM.

**Shared intrinsic properties across different working memory tasks.** Prefrontal cortex and other higher-order cortical areas have been shown to integrate information in a flexible manner and switch between tasks seamlessly [8]. Along this line of thought, we hypothesized that the intrinsic properties optimized for one WM task should be generalizable to other tasks that also require WM. In order to test this hypothesis, we re-trained all the RNNs that were trained in the previous sections to perform the DMS task without tuning the intrinsic parameters. For example, given a network trained on the non-WM integration task, we froze its intrinsic ( $R$ ,  $\tau_m$ ,  $v_{\text{rest}}$ ,  $v_{\text{reset}}$ ,  $\vartheta$ ) along with the synaptic decay time constant ( $\tau$ ) and optimized the recurrent connections ( $W$ ) only using BPTT (see Methods). Therefore, each of the 20 RNNs trained for each of the four tasks (non-WM integration, delayed integration, DMS, and DIS tasks) was re-trained to perform the DMS task. As expected, the average number of trials required to successfully retrain the RNNs previously trained for the DMS task was low at  $4408.95 \pm 3596.27$  (Fig. 3A). The number of trials required to re-train the RNNs from the DIS task was also low at  $4180.30 \pm 2692.81$ . The RNNs trained for the delayed integration task took longer to re-train at  $5391.85 \pm 2197.99$ . The non-WM RNNs required the most number of training trials to perform the DMS task ( $9647.55 \pm 2933.17$ ). These findings indicate that the intrinsic properties from one WM model are transferable to other WM models.

Based on these previous results, the membrane time constant ( $\tau_m$ ) and the synaptic decay ( $\tau$ ) variables appeared to be the two most important parameters for the transferability of WM. To test this, we repeated the re-training procedure with both  $\tau_m$  and  $\tau$  either fixed (“frozen”) or optimized (“tuned”) for the non-WM RNNs (see Methods). For the “frozen” condition (i.e.,  $\tau_m$  and  $\tau$  frozen while the other parameters optimized), the number of trials required to re-train the non-WM RNNs to perform the DMS task was high and not significantly different from the number of trials it took with the intrinsic parameters fixed (Fig. 3B). On the other hand, re-tuning only  $\tau_m$  and  $\tau$  with the other parameters fixed (i.e., “tuned” condition) resulted in a significant reduction in training time (Fig. 3B), suggesting that these two parameters are indeed critical for performing WM. Optimizing

both  $\tau_m$  and  $\tau$  resulted in a significant decrease in  $\tau_m$  for both excitatory and inhibitory populations (Fig. 3C). The synaptic decay values decreased for the excitatory units after re-tuning (Fig. 3D left). For the inhibitory population,  $\tau$  was significantly increased (Fig. 3D right).

**Membrane and synaptic decay time constants critical for WM maintenance.** Pyramidal excitatory neurons and parvalbumin (PV) interneurons make up the majority of the neuronal cell population in the cortex, and they have been shown to specialize in fast and reliable encoding of information with high temporal precision [33]. To further investigate if the fast membrane and slow synaptic dynamics of the units from our WM RNNs are aligned with previous experimental findings and to probe how they contribute to WM maintenance, we manipulated  $\tau_m$  and  $\tau$  during different epochs of the DMS task paradigm.

For each of the RNNs trained from the DMS task, we first divided the population into two subgroups based on their  $\tau_m$  values (see Methods). The short  $\tau_m$  group contained units whose  $\tau_m$  was smaller than the lower quartile value, while the long  $\tau_m$  group contained units whose  $\tau_m$  was greater than the upper quartile. During each of the four epochs (fixation, first stimulus, delay, and second stimulus), we then inhibited the two  $\tau_m$  subgroups separately by hyperpolarizing them and assessed the task performance (see Methods). As shown in Fig. 4, inhibiting the short  $\tau_m$  subgroup during the two stimulus windows significantly impaired task performance (Fig. 4B and D), while disrupting the long  $\tau_m$  group did not result in significant changes in task performance in all four task epochs.

We repeated the above analysis with two subgroups derived from a quartile split of the synaptic decay time constant ( $\tau$ ; see Methods). Suppressing the synaptic connections in the long  $\tau$  subgroup during the first stimulus window and the delay period significantly impaired task performance (Fig. 4B and C). Inhibiting the short  $\tau$  group at any of the four epochs did not affect the task performance.

Therefore, the units with the fast membrane voltage dynamics ( $\tau_m$ ) were important for encoding of stimuli, while the slow synaptic dynamics ( $\tau$ ) were critical for maintaining the first stimulus information throughout the period spanning from the first stimulus window to the end of the delay window.



## Discussion

In this study, we presented a new method for directly training spiking RNNs with a gradient-based supervised training algorithm. Our approach allows optimizing not only the synaptic variables but also parameters intrinsic to spiking dynamics. By optimizing a wide range of parameters, we first demonstrated that units with diverse features emerged when the model was trained on a cognitive task (Figs. 1 and 2). We also showed that fast membrane dynamics combined with a slow synaptic property are critical for performing WM tasks (Figs. 3 and 4). Diversity is a basic biological principle that emerged here as a basic computational principle in spiking neural models.

Previous modeling studies have trained RNNs to perform cognitive tasks [8, 34, 35]. Although some of these studies were able to train spiking RNN models, the intrinsic parameters of spiking neurons were not included as trainable variables. By using the mollifier approximation [27], we developed a comprehensive framework that can tune both connectivity and spiking parameters using a gradient-descent method. Training spiking RNNs on multiple tasks using our method revealed functional specialization of excitatory and inhibitory neurons. More importantly, our approach allowed us to identify fast membrane voltage dynamics as an essential property required to encode incoming stimuli robustly for WM tasks.

Previous computational studies employing RNNs assumed that all the units in a network shared the same intrinsic parameters and optimized only synaptic connectivity patterns during training. Recent studies developed models that give rise to units with heterogeneous intrinsic properties. For example, a new activation function that is tunable for each neuron in a network was recently proposed [36]. In addition, we recently trained synaptic decay time constants in a rate RNN model [25]. Although these methods produce heterogeneous units, they do not incorporate parameters inherent to spiking mechanisms. Our method not only allows direct training of synaptic weights of spiking RNNs that abide by Dale’s principle, but also enables training of synaptic and intrinsic membrane parameters for each neuron.

Although our method was successful at training spiking RNNs with biological constraints, the gradient-based method employed in the present study is not biologically plausible. In cortical neural networks, local learning rules, such as spike-timing-dependent plasticity (STDP), were observed, but the gradient-descent algorithm used in our method is neither local to synapses nor local in time

224 [16]. However, this non-locality allowed our method to train intrinsic membrane and connectivity  
 225 parameters, creating biologically plausible neural architectures that solve specified problems. The  
 226 learning algorithm for spiking neurons makes it possible to uncover neural dynamics hidden in  
 227 experimental data [8, 29, 37], thus emphasizing that a biologically realistic model can be constructed  
 228 by non-biological means.

229 Another limitation of our framework arises from our spiking neuron model. Although we were  
 230 able to train models with heterogeneous neurons the leaky integrate-and-fire model used in the  
 231 present study can only capture the dynamics of fast-firing neurons due to the lack of adaptation  
 232 [38]. In particular, several other types of neurons, such as regular-firing and bursting neurons,  
 233 are also common in cortical networks [39]. Applying our method to spiking neuron models with  
 234 adaptation currents, such as those in Hodgkin-Huxley models model [40] and adaptive exponential  
 235 integrate-and-fire model [41], will be an interesting next step to further investigate the role of  
 236 neurons from various firing classes in information processing.

237 In summary, we provide a novel approach for directly training both connectivity and membrane  
 238 parameters in spiking RNNs. Training connectivity and intrinsic membrane parameters revealed  
 239 distinct populations only identifiable by their parameter values, thus enabling investigation of the  
 240 roles played by specific populations in the computation processes. This lays the foundation for  
 241 uncovering how neural circuits process information with discrete spikes and building more power-  
 242 efficient spiking networks.

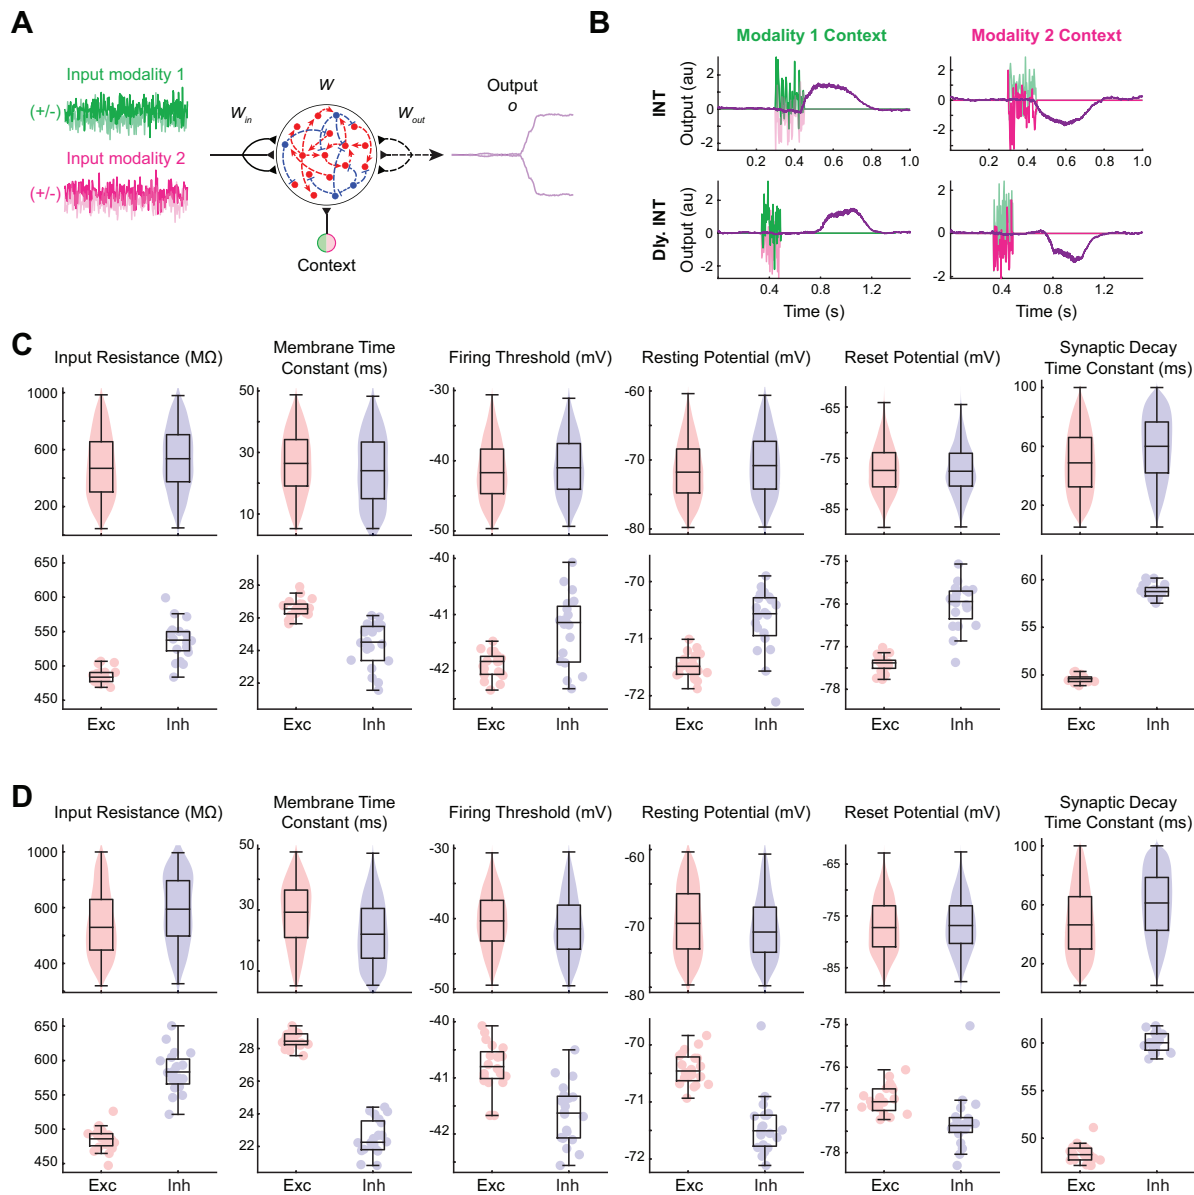

**Fig. 1 | Biologically realistic spiking network performing a context-dependent input integration task.** (A) Schematic diagram of the RNN model trained for the context-dependent integration task. Two streams of noisy input signals (green and magenta lines) along with a context signal were delivered to the LIF RNN. The network was trained to integrate and determine if the mean of the cued input signal (i.e., cued offset value) was positive (“+” choice) or negative (“-” choice) without or with a delay period at the end of the noisy input signals. (B) Example input and output signals from example RNNs trained to perform the task without (top row; INT) or with a delay period (bottom row; Dly. INT). (C) Distributions of the optimized parameters for the excitatory (red) and inhibitory (blue) units across all 20 models trained for the INT task. Top, distributions pooled from all the units from 20 models. Bottom, each dot represents the average value from one network. (D) Distributions of the optimized parameters for the excitatory (red) and inhibitory (blue) units across all 20 models trained for the Dly. INT task. Top, distributions pooled from all the units from 20 models. Bottom, each dot represents the average value from one network.

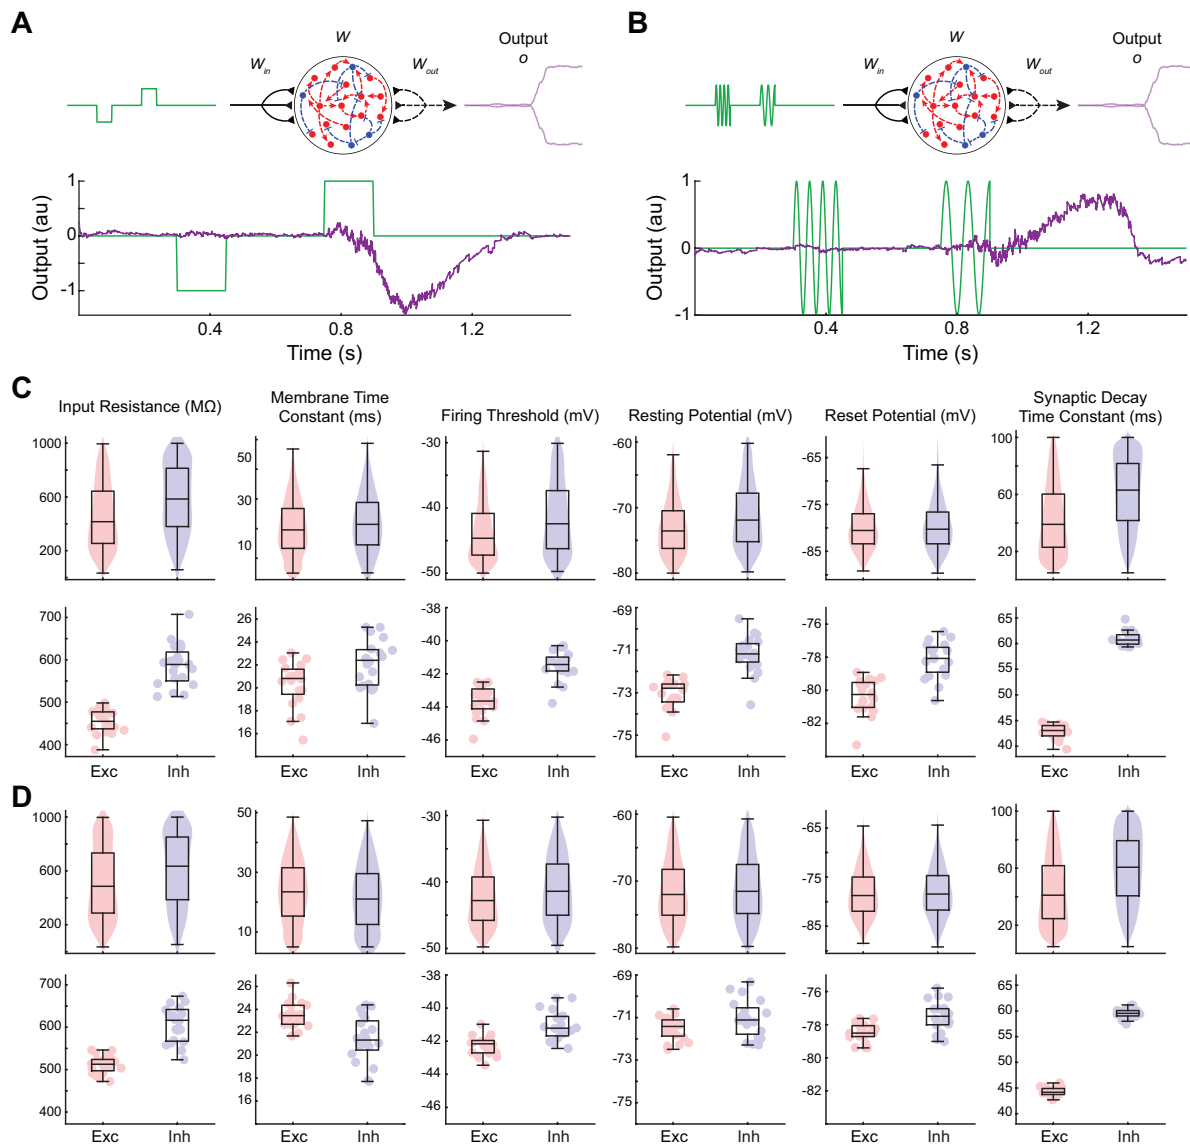

**Fig. 2 | RNNs trained for two additional WM tasks.** (A) Schematic illustrating the task paradigm for the delayed match-to-sample (DMS) task (top) and input and output signals from an example trained RNN (bottom). (B) Schematic illustrating the task paradigm for the delayed discrimination (DIS) task (top) and input and output signals from an example trained RNN (bottom). (C) Distributions of the optimized parameters for the excitatory (red) and inhibitory (blue) units across all 20 models trained for the DMS task. Top, distributions pooled from all the units from 20 models. Bottom, each dot represents the average value from one network. (D) Distributions of the optimized parameters for the excitatory (red) and inhibitory (blue) units across all 20 models trained for the DIS task. Top, distributions pooled from all the units from 20 models. Bottom, each dot represents the average value from one network.

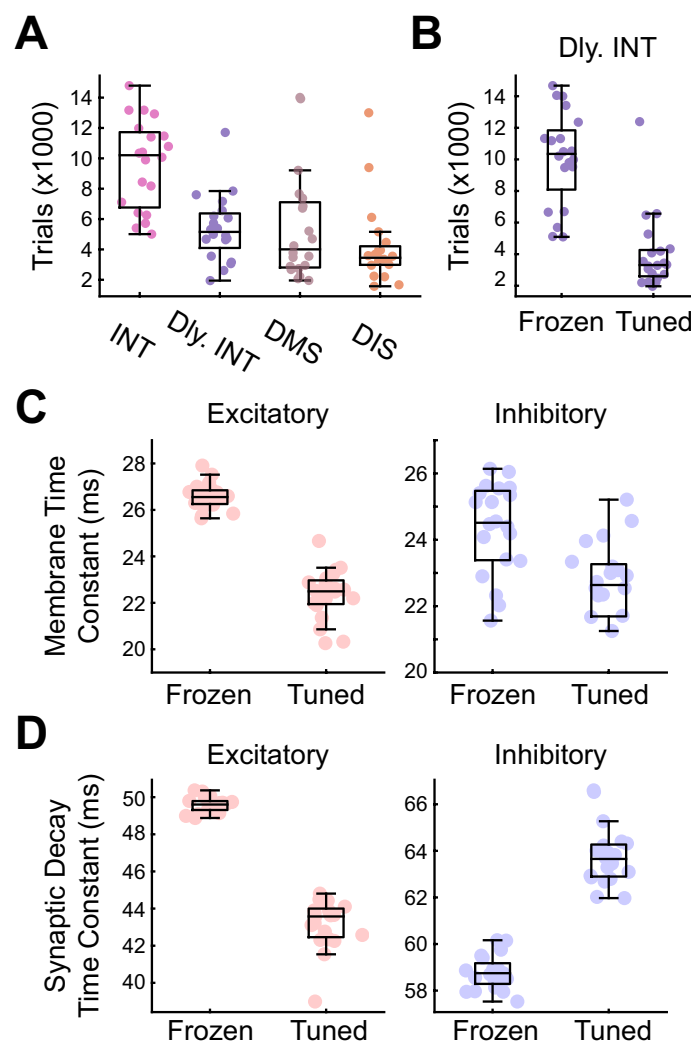

**Fig. 3 | Retraining RNN models to perform the DMS task.** (A) Number of training trials required to retrain the models previously trained for the INT, Dly. INT, DMS, or DIS tasks to perform the DMS task. (B) Number of training trials required to retrain the Dly. INT RNNs to perform the DMS task with the membrane time constant ( $\tau_m$ ) and synaptic decay time constant ( $\tau$ ) frozen or tuned. (C) Distribution of the membrane time constant values for the excitatory (red) and inhibitory (blue) units for the two conditions (frozen and tuned). Each dot represents the average value from one network. (D) Distribution of the synaptic decay time constant values for the excitatory (red) and inhibitory (blue) units for the two conditions (frozen and tuned). Each dot represents the average value from one network.

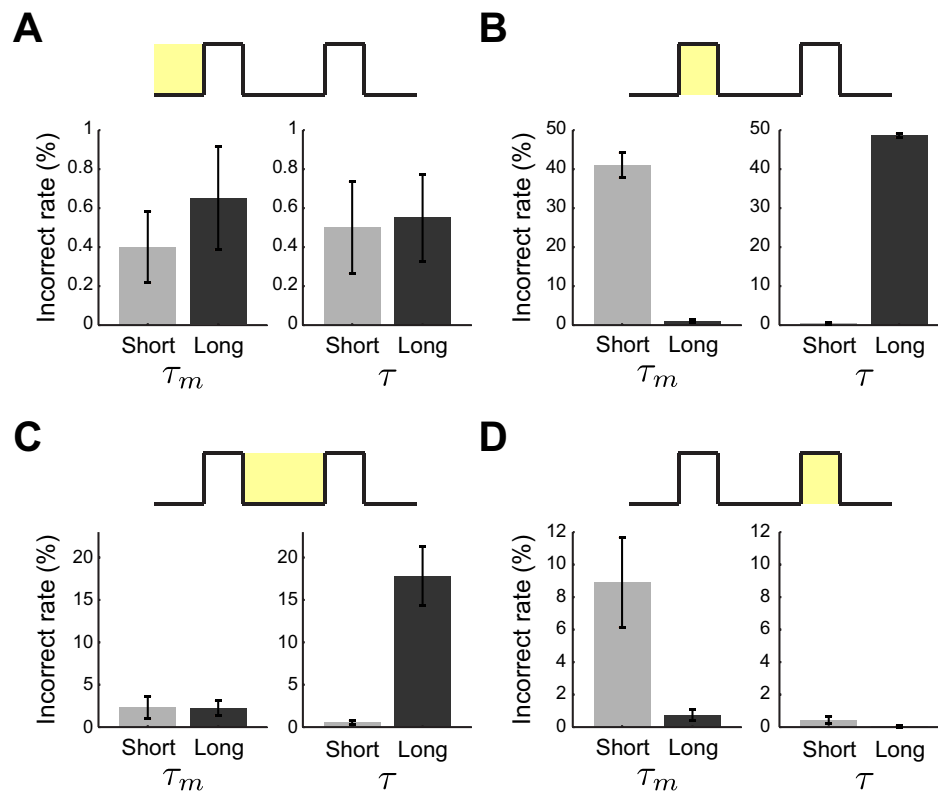

**Fig. 4 | Membrane and synaptic time constants important for encoding stimuli and WM maintenance.** (A–D) DMS task performance when short  $\tau_m$ , long  $\tau_m$ , short  $\tau$ , or long  $\tau$  units were inhibited during the fixation (A), first stimulus window (B), delay period (C), or second stimulus window (D).

## 243 References

- 244 1. Goldman-Rakic, P. S. Cellular basis of working memory. *Neuron* **14**, 477–485 (1995).
- 245 2. Chen, L. & Aihara, K. Chaotic simulated annealing by a neural network model with transient  
246 chaos. *Neural networks* **8**, 915–930 (1995).
- 247 3. Douglas, R. J. & Martin, K. A. Recurrent neuronal circuits in the neocortex. *Current biology*  
248 **17**, R496–R500 (2007).
- 249 4. Wang, X.-J. Decision making in recurrent neuronal circuits. *Neuron* **60**, 215–234 (2008).
- 250 5. Sompolinsky, H., Crisanti, A. & Sommers, H.-J. Chaos in random neural networks. *Physical*  
251 *review letters* **61**, 259 (1988).
- 252 6. Sussillo, D. & Abbott, L. F. Generating coherent patterns of activity from chaotic neural  
253 networks. *Neuron* **63**, 544–557 (2009).
- 254 7. Rajan, K., Abbott, L. & Sompolinsky, H. Stimulus-dependent suppression of chaos in recurrent  
255 neural networks. *Physical review e* **82**, 011903 (2010).
- 256 8. Mante, V., Sussillo, D., Shenoy, K. V. & Newsome, W. T. Context-dependent computation  
257 by recurrent dynamics in prefrontal cortex. *Nature* **503**, 78 (2013).
- 258 9. Mastrogiuseppe, F. & Ostojic, S. Linking connectivity, dynamics, and computations in low-  
259 rank recurrent neural networks. *Neuron* **99**, 609–623 (2018).
- 260 10. Rajan, K., Harvey, C. D. & Tank, D. W. Recurrent network models of sequence generation  
261 and memory. *Neuron* **90**, 128–142 (2016).
- 262 11. VanRullen, R., Guyonneau, R. & Thorpe, S. J. Spike times make sense. *Trends in neuro-*  
263 *sciences* **28**, 1–4 (2005).
- 264 12. Sippy, T., Lapray, D., Crochet, S. & Petersen, C. C. Cell-type-specific sensorimotor processing  
265 in striatal projection neurons during goal-directed behavior. *Neuron* **88**, 298–305 (2015).
- 266 13. Pala, A. & Petersen, C. C. State-dependent cell-type-specific membrane potential dynamics  
267 and unitary synaptic inputs in awake mice. *Elife* **7** (eds Dan, Y. & Marder, E.) e35869 (2018).

- 268 14. Medalla, M., Gilman, J. P., Wang, J.-Y. & Luebke, J. I. Strength and diversity of inhibitory  
269 signaling differentiates primate anterior cingulate from lateral prefrontal cortex. *Journal of*  
270 *neuroscience* **37**, 4717–4734 (2017).
- 271 15. Rumelhart, D. E., Hinton, G. E., Williams, R. J., et al. Learning representations by back-  
272 propagating errors. *Cognitive modeling* **5**, 1 (1988).
- 273 16. Tavanaei, A., Ghodrati, M., Kheradpisheh, S. R., Masquelier, T. & Maida, A. Deep learning  
274 in spiking neural networks. *Neural networks* (2018).
- 275 17. Lee, J. H., Delbruck, T. & Pfeiffer, M. Training deep spiking neural networks using backprop-  
276 agation. *Frontiers in neuroscience* **10**, 508 (2016).
- 277 18. Huh, D. & Sejnowski, T. J. *Gradient descent for spiking neural networks* in *Advances in neural*  
278 *information processing systems* (2018), 1433–1443.
- 279 19. Zhang, W. & Li, P. *Spike-train level backpropagation for training deep recurrent spiking neural*  
280 *networks* in *Advances in neural information processing systems* (2019), 7800–7811.
- 281 20. Neftci, E. O., Mostafa, H. & Zenke, F. Surrogate gradient learning in spiking neural networks.  
282 *Corr abs/1901.09948*. arXiv: 1901.09948 (2019).
- 283 21. Kim, C. M. & Chow, C. C. Learning recurrent dynamics in spiking networks. *Elife* **7** (2018).
- 284 22. Thalmeier, D., Uhlmann, M., Kappen, H. J. & Memmesheimer, R.-M. Learning universal  
285 computations with spikes. *Plos computational biology* **12** (ed Bethge, M.) e1004895 (2016).
- 286 23. Nicola, W. & Clopath, C. Supervised learning in spiking neural networks with force training.  
287 *Nature communications* **8**, 2208 (2017).
- 288 24. Sengupta, A., Ye, Y., Wang, R., Liu, C. & Roy, K. Going deeper in spiking neural networks:  
289 vgg and residual architectures. *Frontiers in neuroscience* **13** (2019).
- 290 25. Kim, R., Li, Y. & Sejnowski, T. J. Simple framework for constructing functional spiking  
291 recurrent neural networks. *Proceedings of the national academy of sciences* **116**, 22811–22820  
292 (2019).
- 293 26. Chelaru, M. I. & Dragoi, V. Efficient coding in heterogeneous neuronal populations. *Proceed-*  
294 *ings of the national academy of sciences* **105**, 16344–16349 (2008).



- 295 27. Ermoliev, Y. M., Norkin, V. I. & Wets, R. J. The minimization of semicontinuous functions:  
296 mollifier subgradients. *Siam journal on control and optimization* **33**, 149–167 (1995).
- 297 28. Werbos, P. J. et al. Backpropagation through time: what it does and how to do it. *Proceedings*  
298 *of the ieee* **78**, 1550–1560 (1990).
- 299 29. Song, H. F., Yang, G. R. & Wang, X.-J. Training excitatory-inhibitory recurrent neural net-  
300 works for cognitive tasks: a simple and flexible framework. *Plos computational biology* **12**,  
301 e1004792 (2016).
- 302 30. Miconi, T. Biologically plausible learning in recurrent neural networks reproduces neural dy-  
303 namics observed during cognitive tasks. *Elife* **6**, e20899 (2017).
- 304 31. Peyrache, A. et al. Spatiotemporal dynamics of neocortical excitation and inhibition during  
305 human sleep. *Proceedings of the national academy of sciences* **109**, 1731–1736 (2012).
- 306 32. Romo, R., Brody, C. D., Hernández, A. & Lemus, L. Neuronal correlates of parametric working  
307 memory in the prefrontal cortex. *Nature* **399**, 470–473 (1999).
- 308 33. Tremblay, R., Lee, S. & Rudy, B. Gabaergic interneurons in the neocortex: from cellular  
309 properties to circuits. *Neuron* **91**, 260–292 (2016).
- 310 34. Song, H. F., Yang, G. R. & Wang, X.-J. Training excitatory-inhibitory recurrent neural net-  
311 works for cognitive tasks: a simple and flexible framework. *Plos computational biology* **12** (ed  
312 Sporns, O.) e1004792 (2016).
- 313 35. Miconi, T. Biologically plausible learning in recurrent neural networks reproduces neural dy-  
314 namics observed during cognitive tasks. *Elife* **6** (ed Frank, M. J.) e20899 (2017).
- 315 36. Ramachandran, P., Zoph, B. & Le, Q. V. Searching for activation functions. *Arxiv preprint*  
316 *arxiv:1710.05941* (2017).
- 317 37. Remington, E. D., Narain, D., Hosseini, E. A. & Jazayeri, M. Flexible sensorimotor compu-  
318 tations through rapid reconfiguration of cortical dynamics. *Neuron* **98**, 1005–1019 (2018).
- 319 38. Gerstner, W., Kistler, W. M., Naud, R. & Paninski, L. in. Chap. 1.41 (Cambridge University  
320 Press, 2014).
- 321 39. Connors, B. W. & Gutnick, M. J. Intrinsic firing patterns of diverse neocortical neurons.  
322 *Trends in neurosciences* **13**, 99–104 (1990).

- 323 40. Hodgkin, A. L. & Huxley, A. F. A quantitative description of membrane current and its  
324 application to conduction and excitation in nerve. *The journal of physiology* **117**, 500–544  
325 (1952).
- 326 41. Brette, R. & Gerstner, W. Adaptive exponential integrate-and-fire model as an effective de-  
327 scription of neuronal activity. *Journal of neurophysiology* **94**, 3637–3642 (2005).
- 328 42. Kingma, D. P. & Ba, J. Adam: a method for stochastic optimization. *Arxiv preprint arxiv:1412.6980*  
329 (2014).
- 330 43. Hochreiter, S., Bengio, Y., Frasconi, P., Schmidhuber, J., et al. *Gradient flow in recurrent*  
331 *nets: the difficulty of learning long-term dependencies* 2001.

332

## 333 Acknowledgements

334 We are grateful to Jorge Aldana for assistance with computing resources. This work was funded by  
335 the DARPA (W911NF1820259 to TJS) and National Institute of Mental Health (F30MH115605-  
336 01A1 to R.K.). We also gratefully acknowledge the support of NVIDIA Corporation with the  
337 donation of the Quadro P6000 GPU used for this research. The funders had no role in study  
338 design, data collection and analysis, decision to publish, or preparation of the manuscript.

## 339 Author contributions

340 Y.L., R.K., and T.J.S. designed the study and wrote the manuscript. Y.L. performed the analyses  
341 and simulations.

## 342 Declaration of interests

343 The authors declare no competing interests.

## 344 Methods

345 **Spiking network structure and discretization.** Our spiking RNN model consisted of  $N$  integrate-  
346 and-fire (LIF) units is governed by

$$\tau_{m,i} \frac{dv_i}{dt} = -(v_i(t) - v_{\text{rest},i}) + R_i I_i(t) + \xi \quad (4)$$

347 where  $\tau_{m,i}$  is the membrane time constant of unit  $i$ ,  $v_i(t)$  is the membrane voltage of unit  $i$  at  
348 time  $t$ ,  $v_{\text{rest},i}$  is the resting potential of unit  $i$ , and  $R_i$  is the input resistance of unit  $i$ , and  $\xi$  is the  
349 membrane voltage spontaneous fluctuation.  $I_i(t)$  represents the current input to unit  $i$  at time  $t$ ,  
350 which is given by:

$$I_i(t) = \sum_{j=1}^N s_{ij}(t) + I_{\text{ext},i}(t) \quad (5)$$

351 where  $N$  is the total number of units in the network,  $s_{ij}(t)$  is the filtered spike train of unit  $j$  to  
352 unit  $i$  at time  $t$ , and  $I_{\text{ext},i}(t)$  is the external current source into unit  $i$  at time  $t$ . For this study,  
353  $N = 400$  for all tasks and networks trained.

354 The external current  $\mathbf{I}_{\text{ext}}(t)$  encodes the task-specific input at time  $t$ :

$$\mathbf{I}_{\text{ext}}(t) = \mathbf{W}_{\text{in}} \mathbf{u}(t) \quad (6)$$

355 where the time-varying stimulus signals  $\mathbf{u}(t) \in \mathbb{R}^{N_{\text{in}} \times 1}$  are fed into the network via  $\mathbf{W}_{\text{in}} \in \mathbb{R}^{N \times N_{\text{in}}}$ ,  
356 which can be viewed as presynaptic connections to the network that convert analog input into firing  
357 rates.  $N_{\text{in}}$  corresponds to the number of channels in the input signal.

358 We used a single exponential synaptic filter:

$$\tau_{ij} \frac{ds_{ij}}{dt} = -s_{ij}(t) + \sum_{t_j^{(k)} < t} w_{ij} \delta(t - t_j^{(k)}) \quad (7)$$

359 where  $\tau_{ij}$  is the synaptic decay time constant from unit  $j$  to unit  $i$ ,  $w_{ij}$  is the synaptic strength  
360 from unit  $j$  to unit  $i$ ,  $t_j^{(k)}$  denotes the time of the  $k$ -th action potential of unit  $j$ , and  $\delta(x)$  is the  
361 Dirac delta function. Once the membrane voltage of the unit  $i$  crosses its action potential threshold  
362 ( $\vartheta_i$ ), its membrane voltage is brought back down to its reset voltage ( $v_{\text{reset},i}$ ).

363 The output of our spiking model at time  $t$  is given by

$$o(t) = W_{\text{out}} \mathbf{r}(t) \quad (8)$$

364 where  $W_{\text{out}} \in \mathbb{R}^{1 \times N}$  are the readout weights, and  $\mathbf{r}(t) \in \mathbb{R}^{N \times 1}$ , which can be interpreted as the  
365 firing rate of units, are given by

$$\tau_{r,i} \frac{dr_i}{dt} = -r_i(t) + \sum_{t_i^{(k)} < t} \delta(t - t_i^{(k)}) \quad (9)$$

366 where  $\tau_{r,i}$  is the synaptic decay time constant of firing rate estimate for unit  $i$ .

367 We converted the continuous-time differential equations to discrete-time iterative equations  
368 and used numerical integration (Euler's method) to solve the equations. The membrane voltage  
369  $\mathbf{v} \in \mathbb{R}^{1 \times N}$  at step  $n + 1$  is given by

$$\mathbf{v}^{(n+1)} = \tilde{\mathbf{v}}^{(n)} + \frac{\Delta t}{\tau_m} \left( -(\tilde{\mathbf{v}}^{(n)} - \mathbf{v}_{\text{rest}}) + \mathbf{I}^{(n+1)} \odot \mathbf{R} \right) + c\mathcal{N}(0, \Delta t) \quad (10)$$

370 where  $\Delta t$  is the sampling rate (or step size), which was set  $\Delta t = 1$  ms for this study,  $\tau_m \in \mathbb{R}^{1 \times N}$  is  
371 the membrane time constant,  $\mathbf{v}_{\text{rest}} \in \mathbb{R}^{1 \times N}$  is the resting potential,  $\odot$  refers to Hadamard operation  
372 (element-wise multiplication),  $\frac{\cdot}{\cdot}$  refers to the element-wise division, and  $\mathbf{R} \in \mathbb{R}^{1 \times N}$  is the input  
373 resistance. The term  $c\mathcal{N}(0, \Delta t)$  injects spontaneous membrane fluctuations, where  $\mathcal{N}(0, \Delta t) \in$   
374  $\mathbb{R}^{1 \times N}$  is a Gaussian random vector consisting of  $N$  independent Gaussian random variables with  
375 mean 0 and variance  $\Delta t$ , and  $c$  is the scaling constant for the amplitude of fluctuations, set as  $c = 5$   
376 throughout the study.

377 There are two time-varying terms in Eq. 10, the membrane voltage after reset ( $\tilde{\mathbf{v}}^{(n)}$ ) and input  
378 current ( $\mathbf{I}^{(n+1)}$ ). The voltage reset in the LIF model after action potentials at step  $n$  is formulated  
379 as

$$\tilde{\mathbf{v}}^{(n+1)} = \mathbf{v}^{(n+1)} + (\mathbf{v}_{\text{reset}} - \mathbf{v}^{(n+1)}) \odot H(\mathbf{v}^{(n+1)} - \boldsymbol{\vartheta}) \quad (11)$$

380 where  $\mathbf{v}_{\text{reset}} \in \mathbb{R}^{1 \times N}$  is the reset potential,  $\boldsymbol{\vartheta} \in \mathbb{R}^{1 \times N}$  is the action potential thresholds, and  $H(x)$  is  
381 the element-wise Heaviside step function. The term  $H(\mathbf{v}^{(n+1)} - \boldsymbol{\vartheta})$  represents the spiking output

activities at step  $n + 1$ . The input current at step  $n + 1$  is given by

$$\mathbf{I}^{(n+1)} = S^{(n)} \cdot \mathbf{1} + W_{\text{in}} \mathbf{u}^{(n+1)} \quad (12)$$

where  $\mathbf{1} \in \mathbb{R}^{1 \times N}$  is the column vector with all ones and  $S^{(n)}$  is the filtered spike train matrix at step  $n$ , which follows the iteration

$$S^{(n)} = S^{(n-1)} + \frac{\Delta t}{T} \left( -S^{(n-1)} + W \odot H(\mathbf{v}^{(n)} - \boldsymbol{\vartheta}) \right) \quad (13)$$

where  $T \in \mathbb{R}^{N \times N}$  is the matrix of synaptic decay time constants and  $W \in \mathbb{R}^{N \times N}$  is the matrix of synaptic strengths. Here,  $W \in \mathbb{R}^{N \times N}$  is a matrix and  $H(\mathbf{v}^{(n)} - \boldsymbol{\vartheta}) \in \mathbb{R}^{1 \times N}$  is a row vector. The notation  $A \odot \mathbf{v}$  refers to element-wise multiplication of matrix  $A$  row by row with the row vector  $\mathbf{v}$ .

The output at step  $n + 1$  is computed by

$$\mathbf{o}^{(n+1)} = W_{\text{out}} \mathbf{r}^{(n+1)} \quad (14)$$

in which

$$\mathbf{r}^{(n+1)} = \mathbf{r}^{(n)} + \frac{\Delta t}{\tau_r} \left( -\mathbf{r}^{(n)} + H(\mathbf{v}^{(n+1)} - \boldsymbol{\vartheta}) \right) \quad (15)$$

where  $\tau_r \in \mathbb{R}^{1 \times N}$  is the synaptic decay time constants of firing rate estimate.

**Training details.** In this study, we only used the supervised backpropagation of errors learning algorithm. The loss function ( $\mathcal{L}$ ) is defined in terms of the root mean square error (RMSE) with respect to a task-specific target signal ( $\mathbf{z}$ ) and the network output signal ( $\mathbf{o}$ ):

$$\mathcal{L} := \sqrt{\left( \sum_{n=1}^M (z^{(n)} - o^{(n)})^2 \right)} \quad (16)$$

where  $M$  is the total time steps.

We used *Adaptive Moment Estimation (ADAM) stochastic gradient descent algorithm* [42] with mini-batch training. The mollifier gradient approximations were employed to address non-differentiability problem associated with the spiking process (see **Mollifier gradient approximations**). The learning rate was set to 0.01, the batch size was set to 10, and the first and

second moment decay rates were 0.9 and 0.999, respectively. The trainable parameters include input weights ( $W_{\text{in}}$ ), synaptic strengths ( $W$ ), readout weights ( $W_{\text{out}}$ ), synaptic decay time constants ( $T$ ), membrane time constants ( $\tau_m$ ), input resistances ( $R$ ), resting potentials ( $v_{\text{rest}}$ ), reset voltages ( $v_{\text{reset}}$ ), action potential thresholds ( $\vartheta$ ), and synaptic decay time constants for firing rate estimates ( $\tau_r$ ).

A *nonlinear projected gradient method* was used to constrain parameters within the biologically realistic ranges described in Supplementary Table 1. A linear projection map forces some solutions to be projected on the boundary. That is, there are always some units whose parameters take the min and max values of the constraint. On the other hand, a nonlinear projection guarantees that no values are on the boundary almost surely, a more realistic situation to consider. Specifically, to bound a parameter  $p$  at iteration  $i + 1$  into the range  $[p_{\min}, p_{\max}]$ , we have

$$\tilde{p}_{i+1} = \sigma(p_{i+1}) \cdot (p_{\max} - p_{\min}) + p_{\min} \quad (17)$$

where  $\tilde{p}_{i+1}$  is the projected solution of parameter  $p$  at iteration  $i + 1$ ,  $p_{i+1}$  is the unconstrained solution given by the gradient descent algorithm at iteration  $i + 1$ ,  $p_{\max}$  and  $p_{\min}$  are the maximum and minimum values of parameter  $p$ , and  $\sigma(x)$  is the sigmoid function, defined as

$$\sigma(x) := \frac{1}{1 + \exp(-x)} \quad (18)$$

We *initialized all parameters*, except the input weights ( $W_{\text{in}}$ ), as samples from the standard Gaussian distribution with zero mean and unit variance, whereas the input weights were drawn from Gaussian distribution with zero mean and variance 400. This is because our input signals were bounded within the range  $[-1, 1]$ , insufficient to bring the membrane voltage from the resting potential above the action potential threshold. Hence, to accelerate training, it was necessary to make sure units were excited by the input signals in the first place. The synaptic strength matrix ( $W$ ) was also initialized sparse, with the percentage of connectivity being only 20%. We say the network successfully did the task if the output signal hits above +0.8 (or below -0.8) if the target output is +1 (or -1). We stopped training when the loss ( $\mathcal{L}$ ) is less than 15 and the accuracy over 100 trials is above 95%.

The method proposed by Song et al. [29] was used to *impose Dale’s principle* with separate excitatory and inhibitory populations. The synaptic connectivity matrix ( $W$ ) in the model was parametrized by

$$\tilde{W}_{i+1} = [W_{i+1}]_+ \cdot D \quad (19)$$

where  $\tilde{W}_{i+1}$  is the resulted matrix that encoded separate populations at update step  $i + 1$ ,  $W_{i+1}$  is the solution given by the gradient descent algorithm at step  $i + 1$ , and  $[\cdot]_+$  is the rectified linear unit (ReLU) operation applied at the end of each update step. The ReLU operation is to ensure that entries of the matrix are always non-negative before multiplied by the matrix  $D$ , as the negative weight connections update from gradient descent are pruned by the end of each update. The diagonal matrix ( $D \in \mathbb{R}^{N \times N}$ ) encode  $+1$  for excitatory units and  $-1$  for inhibitory units. The value of matrix ( $D$ ) was randomly assigned before training according to a preset proportion between inhibitory and excitatory units, and the value  $D$  was fixed through the whole training process. The I/E units proportion in this study was 20% to 80%.

In order to capture the biologically realistic dynamics of SNNs, the *temporal resolution* ( $\Delta t$ ) was set to be no longer than the duration of absolute refractory period to ensure that the spiking activities are not affected by the numerical integration process. Therefore, we set  $\Delta t = 1$  ms during training. Due to the vanishing gradient problem occurring in training RNNs [43], with  $\Delta = 1$  ms, it is impossible to train tasks with duration longer than 1 second (i.e.,  $M > 1000$ ). It is notable that in the above formulation, only membrane time constant ( $\tau_m$ ) and synaptic time decay ( $\tau$ ) are dependent on the sampling rate ( $\Delta t$ ; Eq. 10 and Eq. 13). Hence, after the models are trained, we can make sampling rate ( $\Delta t$ ) smaller (i.e., having finer temporal resolution) while still keeping the same dynamics of the trained networks. Increasing  $\Delta t$  by a factor is equivalent to decreasing  $\tau$  and  $\tau_m$  altogether by the same factor, as  $\tau$  and  $\tau_m$  are inversely proportional to  $\Delta t$  in Eq. 10 and Eq. 13. Hence, to train a network performing tasks with duration longer than 1 second, we need to make the temporal resolution coarser (i.e., increasing  $\Delta t$  by a factor  $s$ ) so that with the same trainable range of time steps (i.e., a fixed  $M \leq 1000$ ), the duration of task becomes longer by the same factor  $s$ . This “decrease in temporal resolution” can be interpreted as shortening  $\tau$  and  $\tau_m$  instead of an actual decrease in temporal resolution. Applying this trick enables us to train tasks with arbitrary duration by re-scaling the ranges of  $\tau$  and  $\tau_m$  into a smaller one while still making

the spiking activities biologically realistic. In practice, we simply scaled down  $\tau$  and  $\tau_m$  by a factor  $s = 3$  with a fixed number of time steps ( $M$ ), and later during the testing stage, we re-scaled  $M$ ,  $\tau$  and  $\tau_m$  up by the same factor  $s$ .

**Mollifier gradient approximations.** In the above formulation, the Heaviside step function  $H(x)$  is not continuous. As a result, the loss function  $\mathcal{L}$  is not differentiable. This poses the major problem when applying the traditional backpropagation algorithm for training neural networks, because the backpropagation algorithm uses gradient descent methods that require the function being minimized to be differentiable, or at least to be continuous. However, the derivative of Heaviside step function  $H(x)$  is Dirac Delta function  $\delta(x)$ , which is 0 everywhere except at 0, where the function value is  $\infty$ . It is difficult to use this derivative for the gradient descent methods because the value of the gradients is 0 almost everywhere.

To address the discontinuity problem, we employed mollifier gradient method proposed by Ermoliev et al. [27]. The method can be applied to any strongly lower semicontinuous functions to find local minima following an iterative gradient descent in which the gradients change over iterations based on averaged functions derived from the original objective function. The family of averaged functions  $f_\varepsilon$  of function  $f$  is defined by convolution of  $f$  with a mollifier:  $\psi_\varepsilon$

$$f_\varepsilon(x) := \int_{\mathbb{R}^n} f(x-z)\psi_\varepsilon(z)dz = \int_{\mathbb{R}^n} f(x)\psi_\varepsilon(x-z)dz = f * \psi_\varepsilon(x) \quad (20)$$

where  $\psi_\varepsilon \in \{\psi_\varepsilon: \mathbb{R}^n \rightarrow \mathbb{R}_+, \varepsilon > 0\}$ , a family of compactly supported (generalized) functions named *mollifiers* that satisfy

$$\int_{\mathbb{R}^n} \psi_\varepsilon(x) dx = 1, \quad \lim_{\varepsilon \rightarrow 0} \psi_\varepsilon(x) = \lim_{\varepsilon \rightarrow 0} \varepsilon^{-n} \psi_\varepsilon(x/\varepsilon) = \delta(x) \quad (21)$$

It was shown that for any strongly lower semicontinuous functions  $f$ , the averaged functions  $f_\varepsilon$  epi-converge to  $f$  as  $\varepsilon \rightarrow 0$ , a type of convergence that preserves the local minima and minimizers. Therefore, it is possible to use the gradients of averaged functions to minimize the original lower semicontinuous functions and find the local minima. We used the conventional family of mollifiers



obtained by normalizing a probability density function  $\psi$ :

$$\psi_\varepsilon(z) := \frac{\psi(z/\varepsilon)}{\varepsilon^n} \quad (22)$$

In our case,  $n = 1$  as the domain of  $H(x)$  is the real line:

$$H_\varepsilon(x) := \frac{1}{\varepsilon} \int_{-\infty}^{\infty} H(x - z) \psi(z/\varepsilon) dz \quad (23)$$

For any  $\varepsilon > 0$ , the gradient of  $H_\varepsilon(g(x))$  with respect to parameter  $p$  is given by

$$\nabla_p H_\varepsilon(g(x)) = \frac{1}{\varepsilon} \psi(g(x)/\varepsilon) \nabla_p g(x) = \psi_\varepsilon(g(x)) \nabla_p g(x) \quad (24)$$

where  $\psi$  is some symmetric density function and  $g(x)$  is any function with  $\mathbb{R}$  as its codomain. Since our goal was not to find a local minimum  $x^*$  that satisfies the optimality condition  $\lim_{\varepsilon \rightarrow 0} \|\nabla f_\varepsilon(x^*)\| = 0$  as defined by Ermoliev et al., but rather to minimize the loss function for its value to be sufficiently small so that the network can perform the task correctly, we did not vary the gradients during the minimization process. Instead, we fixed an approximation of the gradient and used the approximation throughout the training process. We chose the normalized box function, i.e., the density function of uniform distribution  $\mathcal{U}(-\varepsilon/2, \varepsilon/2)$ , as the kernel,

$$\psi(x) := \begin{cases} \frac{1}{\varepsilon} & \text{for } x \in [-\varepsilon/2, \varepsilon/2] \\ 0 & \text{otherwise} \end{cases} \quad (25)$$

and fixed  $\varepsilon = 5$ .

We found no difference in the trained models with different choices of  $\varepsilon$ , as long as the value was large enough to keep the gradients active so that gradients did not vanish through time steps. There was also no difference between models trained with fixed  $\varepsilon$  and those trained with the original scheme in Ermoliev et al. where  $\varepsilon \rightarrow 0$  as the number of iterations increases. The purpose for fixing the value of  $\varepsilon$  was to compare the training epochs (iterations) among the retraining paradigms (see Fig. 3) with the same gradient.

**Re-training models for DMS task.** To test whether intrinsic properties optimized for one WM task are generalizable to other tasks that also require WM, we re-trained our models to perform the DMS task with all intrinsic properties fixed. In contrast to the training paradigm described in the previous sections, the trainable parameters for re-training only include input weights ( $W_{\text{in}}$ ), synaptic strengths ( $W$ ), and readout weights ( $W_{\text{out}}$ ). Each of the 20 RNNs trained for each of the four tasks (non-WM integration, delayed integration, DMS, and DIS tasks) used in this study was re-trained to perform the DMS task.

To test whether synaptic decay time constants ( $\tau$ ) and membrane time constants ( $\tau_m$ ) are the most crucial parameters for transferability of WM tasks, we repeated the re-training procedure with both  $\tau_m$  and  $\tau$  either fixed or optimized for the non-WM RNNs. The RNNs optimized to perform the context-based input integration task were used for re-training under two schemes: the tuned scheme and the frozen scheme. For the tuned scheme, the trainable parameters include input weights ( $W_{\text{in}}$ ), synaptic strengths ( $W$ ), readout weights ( $W_{\text{out}}$ ), synaptic decay time constants ( $T$ ), membrane time constants ( $\tau_m$ ), and synaptic decay time constants for firing rate estimates ( $\tau_r$ ). For the frozen scheme, the trainable parameters include input weights ( $W_{\text{in}}$ ), synaptic strengths ( $W$ ), readout weights ( $W_{\text{out}}$ ), input resistances ( $R$ ), resting potentials ( $v_{\text{rest}}$ ), reset voltages ( $v_{\text{reset}}$ ), and action potential thresholds ( $\vartheta$ ).

**Units function analysis.** For Fig. 4, we manipulated  $\tau_m$  and  $\tau$  during different epochs of the DMS task paradigm to investigate if fast membrane and slow synaptic dynamics are responsible for WM maintenance. For each of the RNNs trained from the DMS task, we first divided the population into two subgroups based on their  $\tau_m$  values. The short  $\tau_m$  group contained units whose  $\tau_m$  was smaller than the median value of  $\tau_m$  of all units in the RNN, while the long  $\tau_m$  group contained units whose  $\tau_m$  was greater than the median value. The average median value of  $\tau_m$  across all 20 models was  $19.64 \pm 2.45$  ms. During each of the four epochs (fixation, first stimulus, delay, and second stimulus), we inhibited the two  $\tau_m$  subgroups separately by hyperpolarizing them and then assessed the task performance. The hyperpolarization was done by setting the membrane voltage  $v = -100$  mV for the intended subgroup of units. Similar to the training stage, we say that the network successfully did the task if the output signal hits above  $+0.8$  (or below  $-0.8$ ) if the target output is  $+1$  (or  $-1$ ). If the target output is between  $-0.8$  and  $+0.8$ , the network is considered

519 having no response. If the output signal is above +0.8 (or below −0.8) while the target output is  
520 −1 (or +1), we say that the network gives an incorrect response.

521 We conducted a similar analysis based on two subgroups of synapses derived from a quartile  
522 split of synaptic decay time constant ( $\tau$ ). The short  $\tau$  group contained synapses whose  $\tau$  was  
523 smaller than the 25th percentile of all  $\tau$  in the RNN, while the long  $\tau$  group contained synapses  
524 whose  $\tau$  was greater than the 75th percentile. The average 25th percentile across all 20 models was  
525  $25.36 \pm 2.40$  ms, and the average 75th percentile was  $66.18 \pm 1.17$  ms. The targeted subgroup of  
526 synapses was suppressed by setting the connection strength  $w = 0$  during each of the four epochs  
527 of DMS task.

## 528 **Code availability**

529 The implementation of our framework and the codes to generate all the figures in this work are  
530 available at <https://github.com/y-inghao-li/SRNN/>

## 531 **Data availability**

532 The trained models used in the present study are available as MATLAB-formatted data at [https:](https://github.com/y-inghao-li/SRNN/)  
533 [//github.com/y-inghao-li/SRNN/](https://github.com/y-inghao-li/SRNN/)

## Supplementary Table

| Parameter name             | Symbol             | Minimum                   | Maximum                  |
|----------------------------|--------------------|---------------------------|--------------------------|
| Input resistance           | $R$                | 5 M $\Omega$              | 1000 M $\Omega$          |
| Membrane time constant     | $\tau_m$           | 5 ms                      | 50 ms                    |
| Action potential threshold | $\vartheta$        | -50 mV                    | -30 mV                   |
| Resting potential          | $v_{\text{rest}}$  | -80 mV                    | -60 mV                   |
| Reset voltage value        | $v_{\text{reset}}$ | $v_{\text{rest}} - 10$ mV | $v_{\text{rest}} - 1$ mV |
| Synaptic decay time        | $\tau$             | 5 ms                      | 100 ms                   |

Supplementary Table 1: **Parameter values used for this study.** To keep the constraint  $v_{\text{rest}} > v_{\text{reset}}$ , we trained the afterhyperpolarization (AHP) potential with range from -10 mV to -1 mV, so the value of  $v_{\text{reset}}$  is dependent upon the value of  $v_{\text{rest}}$ .
